# Supplementary material for: Remarkable solvent-size effects in constructing novel porous 1,3,5-benzenetricarboxylate metal–organic frameworks
Source: Royal Society of Chemistry journal article supplement (doi:10.1039/c2ce25343g), 2012-01-01
Supplement: c2ce25343g.pdf [file c2ce25343g.pdf]

# Supporting Information

## Remarkable solvent-size effects in constructing novel porous 1,3,5-benzenetricarboxylate metal-organic frameworks

Xiang-Rong Hao,<sup>a,b</sup> Xin-Long Wang,<sup>a</sup> Kui-Zhan Shao,<sup>a</sup> Guang-Sheng Yang,<sup>a</sup> Zhong-Min Su,<sup>\*a</sup> Gang Yuan.<sup>a</sup>

*Institute of Functional Materials, College of Chemistry, Northeast Normal University, Changchun 130024, China. Email: [zmsu@nenu.edu.cn](mailto:zmsu@nenu.edu.cn)*

Table S1 Crystallographic data of the compound **1**, **1'**, **1''**, **2**, **2'** and **4**, **4'**

| Compound                                             | <b>1</b>                                                                                    | <b>1'</b> *                                                                                                                | <b>1''</b> *                                                                                                                    | <b>2</b>                                                                                              | <b>2'</b> *                                                           | <b>4</b>                                                                                                  | <b>4'</b> *                                                                                               |
|------------------------------------------------------|---------------------------------------------------------------------------------------------|----------------------------------------------------------------------------------------------------------------------------|---------------------------------------------------------------------------------------------------------------------------------|-------------------------------------------------------------------------------------------------------|-----------------------------------------------------------------------|-----------------------------------------------------------------------------------------------------------|-----------------------------------------------------------------------------------------------------------|
| Chemical formula                                     | $\text{Zn}_2(\text{C}_9\text{H}_3\text{O}_6)(\text{NO}_3)(\text{C}_4\text{H}_9\text{NO})_3$ | $\text{Zn}_2(\text{C}_9\text{H}_3\text{O}_6)(\text{NO}_3) \cdot 5(\text{C}_2\text{H}_5\text{OH}) \cdot \text{H}_2\text{O}$ | $\text{Mg}_2(\text{C}_9\text{H}_3\text{O}_6)(\text{CH}_3\text{COO}) \cdot 3(\text{C}_4\text{H}_9\text{NO})(\text{H}_2\text{O})$ | $\text{Zn}_{11}(\text{C}_9\text{H}_3\text{O}_6)_6(\text{NO}_3)_4(\text{C}_6\text{H}_{13}\text{NO})_9$ | $\text{C}_{155.17}\text{H}_{36}\text{N}_8\text{O}_{98}\text{Zn}_{22}$ | $\text{ZnC}_9\text{H}_3\text{O}_6 \cdot \text{C}_4\text{H}_9\text{NO} \cdot \text{C}_2\text{H}_8\text{N}$ | $\text{ZnC}_9\text{H}_3\text{O}_6 \cdot \text{C}_3\text{H}_7\text{NO} \cdot \text{C}_2\text{H}_8\text{N}$ |
| Formula Mass                                         | 661.23                                                                                      | 648.22                                                                                                                     | 576.14                                                                                                                          | 3246.36                                                                                               | 5018.10                                                               | 405.70                                                                                                    | 391.67                                                                                                    |
| Crystal system                                       | Orthorhombic                                                                                | Orthorhombic                                                                                                               | Orthorhombic                                                                                                                    | Cubic                                                                                                 | Cubic                                                                 | Monoclinic                                                                                                | Monoclinic                                                                                                |
| $a/\text{\AA}$                                       | 12.935(5)                                                                                   | 14.728(4)                                                                                                                  | 12.537(5)                                                                                                                       | 20.573(5)                                                                                             | 20.4582(13)                                                           | 9.320(5)                                                                                                  | 9.4550(6)                                                                                                 |
| $b/\text{\AA}$                                       | 14.708(5)                                                                                   | 14.728(4)                                                                                                                  | 14.977(5)                                                                                                                       | 20.573(5)                                                                                             | 20.4582(13)                                                           | 16.107(5)                                                                                                 | 16.0074(11)                                                                                               |
| $c/\text{\AA}$                                       | 15.359(5)                                                                                   | 14.728(4)                                                                                                                  | 15.404(6)                                                                                                                       | 20.573(5)                                                                                             | 20.4582(13)                                                           | 12.608(5)                                                                                                 | 11.0347(7)                                                                                                |
| $\alpha/^\circ$                                      | 90.000(5)                                                                                   | 90.000(5)                                                                                                                  | 90.00                                                                                                                           | 90.000(5)                                                                                             | 90.00                                                                 | 90.000(5)                                                                                                 | 90.000(5)                                                                                                 |
| $\beta/^\circ$                                       | 90.000(5)                                                                                   | 90.000(5)                                                                                                                  | 90.00                                                                                                                           | 90.000(5)                                                                                             | 90.00                                                                 | 100.942(5)                                                                                                | 98.4660(10)                                                                                               |
| $\gamma/^\circ$                                      | 90.000(5)                                                                                   | 90.000(5)                                                                                                                  | 90.00                                                                                                                           | 90.000(5)                                                                                             | 90.00                                                                 | 90.000(5)                                                                                                 | 90.000(5)                                                                                                 |
| Unit cell volume/ $\text{\AA}^3$                     | 2922.0(18)                                                                                  | 3195(2)                                                                                                                    | 2892.3(18)                                                                                                                      | 8707(4)                                                                                               | 8562.5(9)                                                             | 1858.3(14)                                                                                                | 1651.90(19)                                                                                               |
| Temperature/K                                        | 293(2)                                                                                      | 293(2)                                                                                                                     | 213(2)                                                                                                                          | 293(2)                                                                                                | 173(2)                                                                | 293(2)                                                                                                    | 293(2)                                                                                                    |
| Space group                                          | $P212121$                                                                                   | $P213$                                                                                                                     | $P212121$                                                                                                                       | $Pm\bar{3}m$                                                                                          | $Pm\bar{3}m$                                                          | $P21/n$                                                                                                   | $P21/n$                                                                                                   |
| $Z$                                                  | 4                                                                                           | 4                                                                                                                          | 4                                                                                                                               | 1                                                                                                     | 1                                                                     | 4                                                                                                         | 4                                                                                                         |
| No. of reflections measured                          | 14745                                                                                       |                                                                                                                            | 9123                                                                                                                            | 44723                                                                                                 | 14454                                                                 | 9299                                                                                                      |                                                                                                           |
| No. of independent reflections                       | 5143                                                                                        |                                                                                                                            | 3725                                                                                                                            | 1582                                                                                                  | 740                                                                   | 3281                                                                                                      |                                                                                                           |
| $R_{int}$                                            | 0.0360                                                                                      |                                                                                                                            | 0.0224                                                                                                                          | 0.1422                                                                                                | 0.0359                                                                | 0.0630                                                                                                    |                                                                                                           |
| Final $R_I$ values ( $I > 2\sigma(I)$ ) <sup>a</sup> | 0.0383                                                                                      |                                                                                                                            | 0.0599                                                                                                                          | 0.1016                                                                                                | 0.1278                                                                | 0.0486                                                                                                    |                                                                                                           |
| Final $wR(F^2)$ values ( $I > 2\sigma(I)$ )          | 0.0995                                                                                      |                                                                                                                            | 0.1517                                                                                                                          | 0.2972                                                                                                | 0.3523                                                                | 0.1101                                                                                                    |                                                                                                           |
| Final $R_I$ values (all data)                        | 0.0468                                                                                      |                                                                                                                            | 0.0704                                                                                                                          | 0.1762                                                                                                | 0.1423                                                                | 0.0874                                                                                                    |                                                                                                           |
| Final $wR(F^2)$ values (all data)                    | 0.1063                                                                                      |                                                                                                                            | 0.1628                                                                                                                          |                                                                                                       | 0.3648                                                                | 0.1269                                                                                                    |                                                                                                           |

<sup>a</sup>  $R1 = \sum ||F_o| - |F_c|| / \sum |F_o|$ . \* compound **1'**, **1''**, **2'** and **4'** have been reported previously.

Table S2. The relationship between the and different size of solvents.

|                    | DMF         | DMA                         | DEE                     | DEP      | DPE | DPP |
|--------------------|-------------|-----------------------------|-------------------------|----------|-----|-----|
| btc-Zn / Method I  | <b>1'</b> * | <b>1</b>                    | <b>2</b>                | <b>3</b> | X   | X   |
| btc-Zn / Method II | <b>4'</b> * | <b>4, 5 6<sup>#</sup></b> , | <b>6<sup>#</sup>, 7</b> | X        | X   | X   |

\* **1'** and **4'** have been reported previously. **1'** is prepared in alcohol. <sup>#</sup> **6** was first obtained in a mixture of DMA and DEE (3:1 v/v) solvent, it also can obtained DMA solvent occasionally. Symbol "X" indicates no single crystal samples suitable for measuring can be obtained.

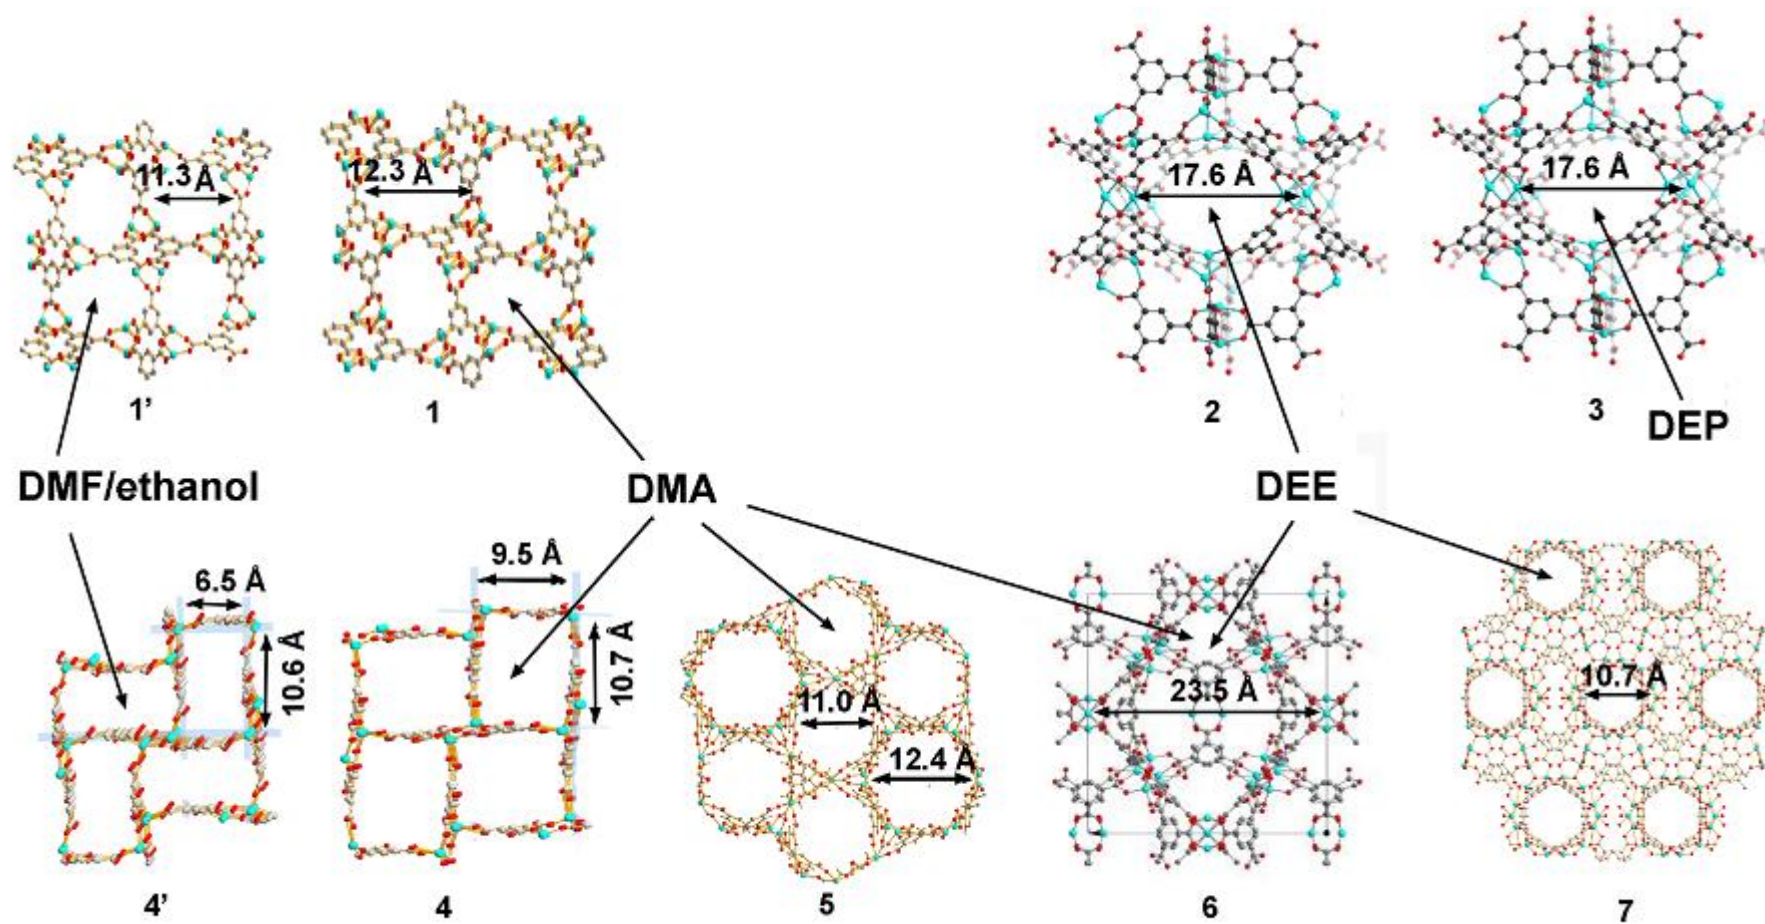

**Fig. S1** A view of frameworks 1-7 showing the different pore size introduced by solvents and breathing phenomenon.

## PXRD analysis:

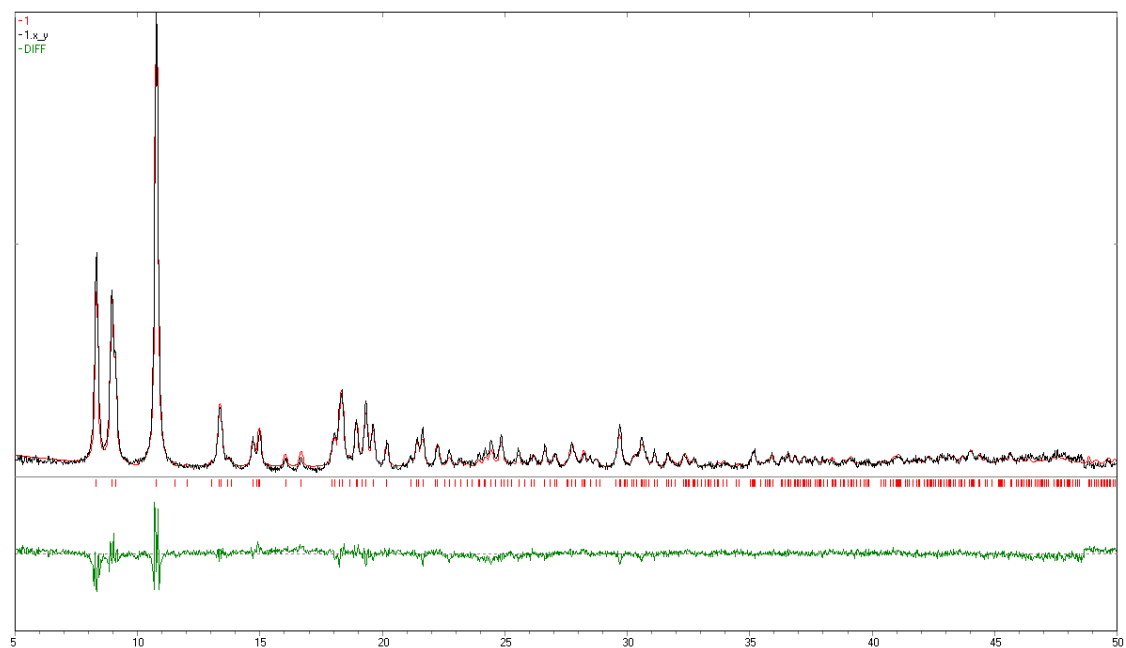

**Fig. S2.** PXRD patterns for **1**: the calculated X-ray crystal structure (red), experimental XRPD pattern (black) and difference (green) of the bulk material.

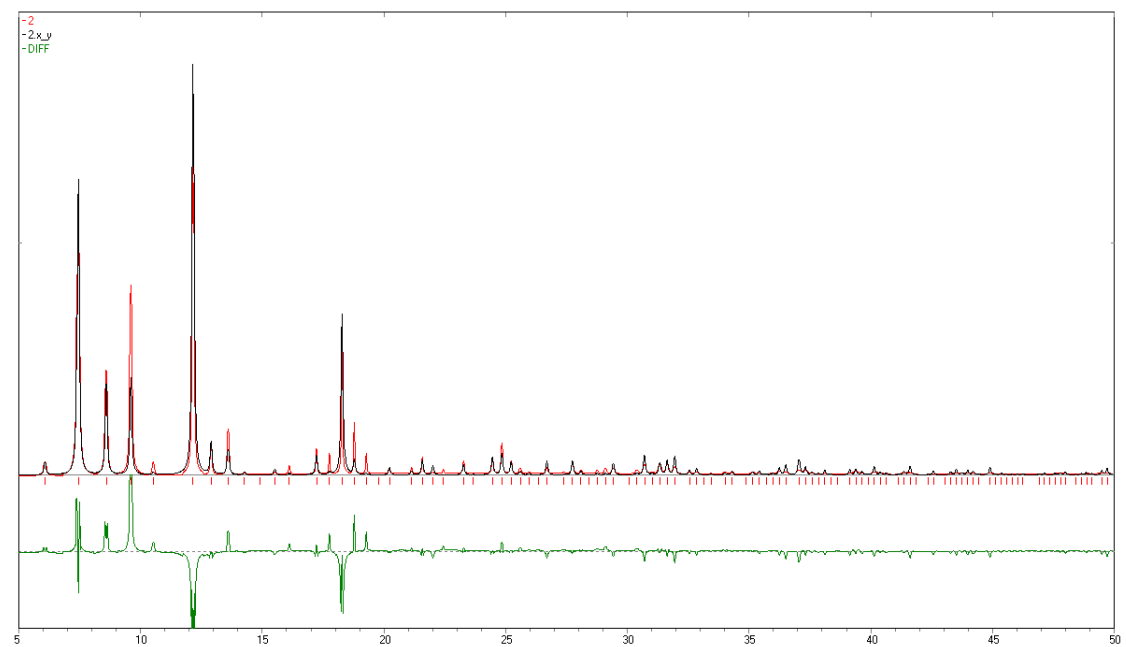

**Fig. S3.** PXRD patterns for **2**: the calculated X-ray crystal structure (red), experimental XRPD pattern (black) and difference (green) of the bulk material.

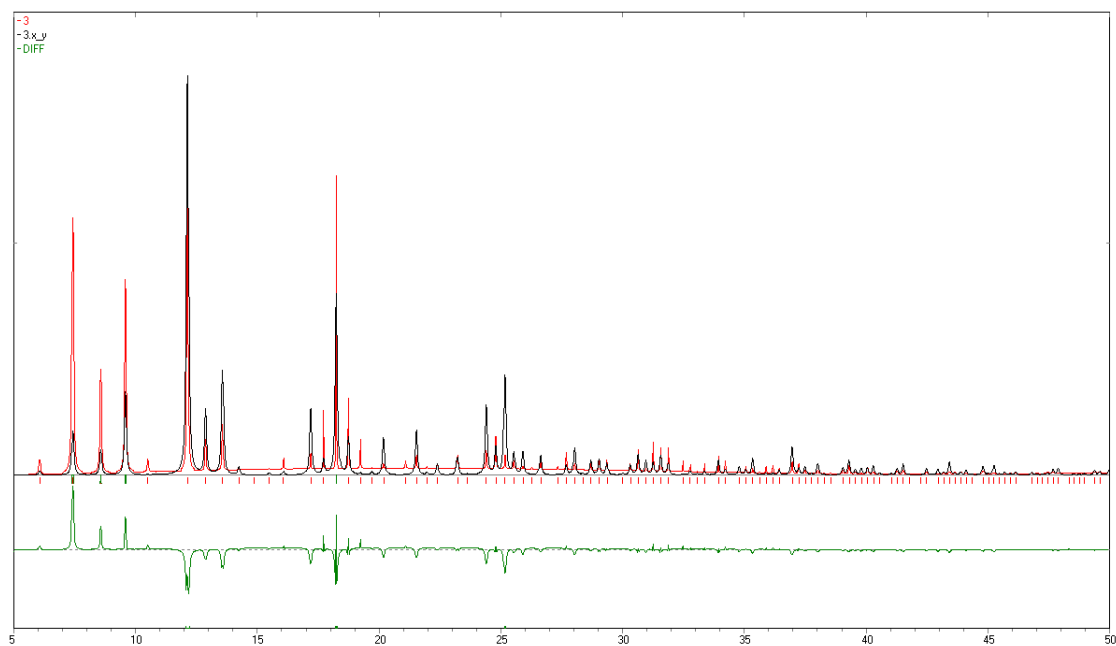

**Fig. S4.** PXRD patterns for **3**: the calculated X-ray crystal structure (red), experimental XRPD pattern (black) and difference (green) of the bulk material.

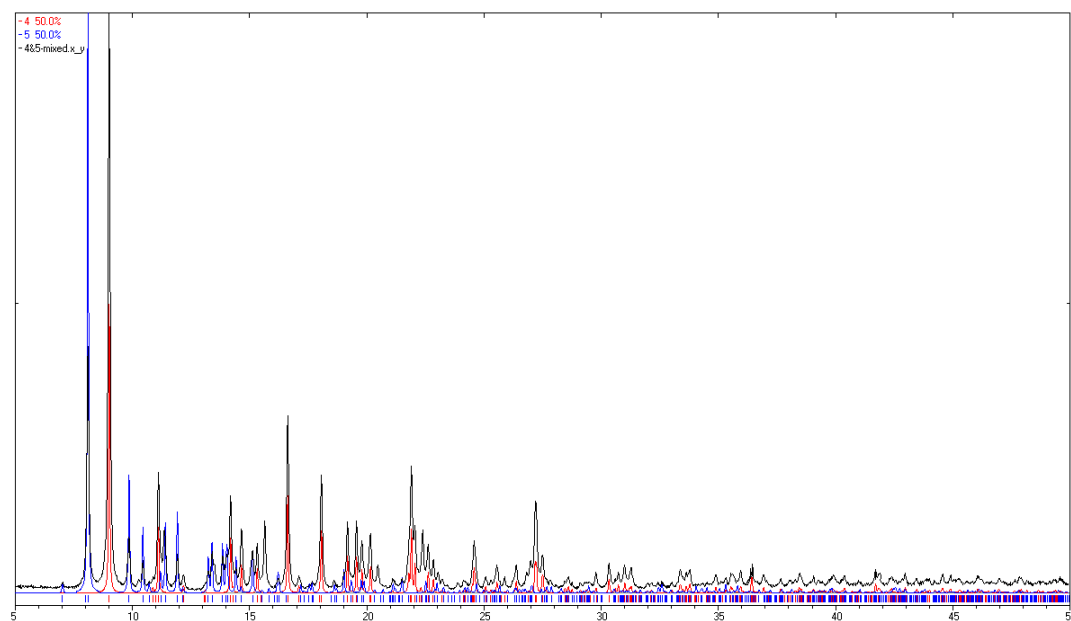

**Fig. S5.** PXRD patterns for the bulk of **4** (or **5**) present a mixed-phase characterization: the calculated X-ray crystal structure of **4** (red), the calculated X-ray crystal structure of **5** (blue), the experimental XRPD pattern (black) showing that the bulk probably is a mixture of **4** and **5**.

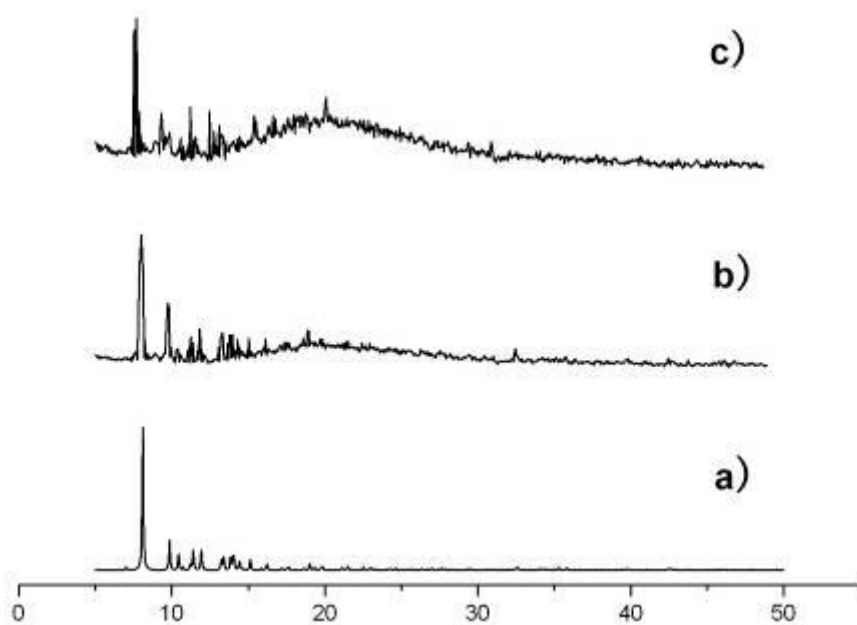

**Fig. S6.** PXRD patterns for **5**: (a) simulated from single-crystal X-ray diffraction data, (b) as-synthesized solids, (c) after the ammonium acetate added in  $\text{dmsO-D}_6$ .

## IR analysis:

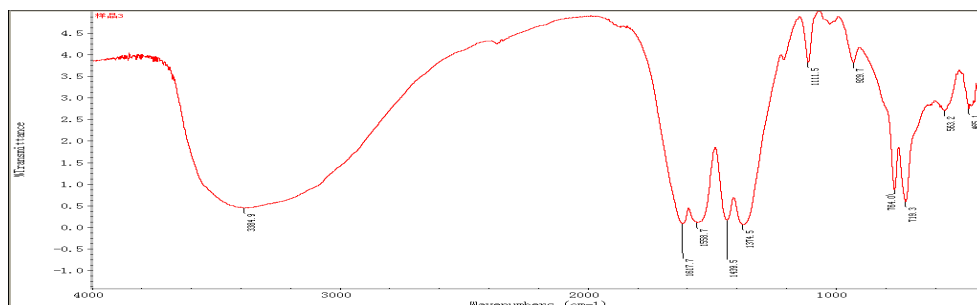

Fig. S16. FT-IR spectrum of as-synthesized -1.

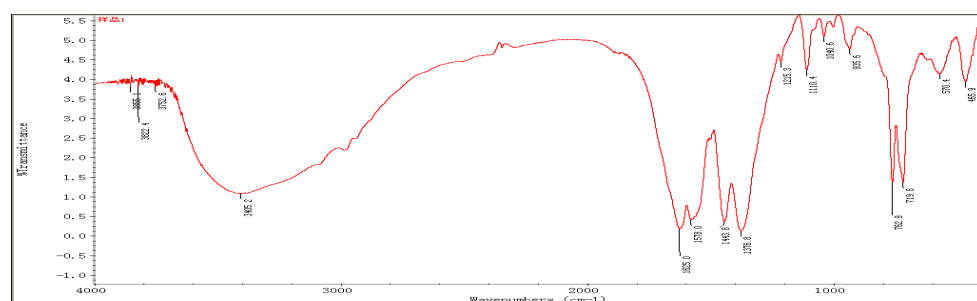

Fig. S17. FT-IR spectrum of as-synthesized -2.

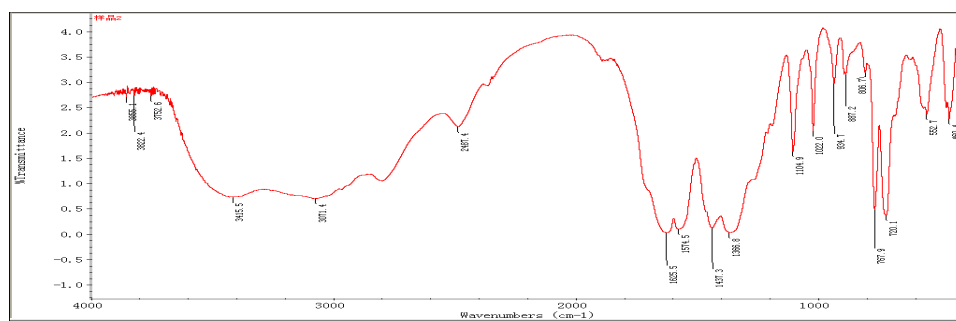

Fig. S18. FT-IR spectrum of as-synthesized -3.

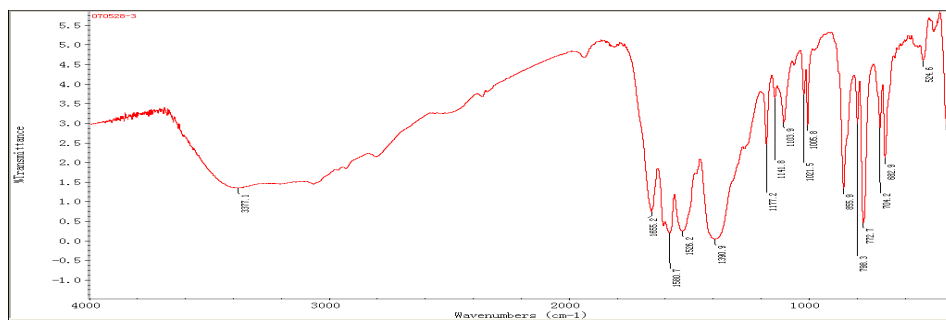

Fig. S19. FT-IR spectrum of as-synthesized -4.

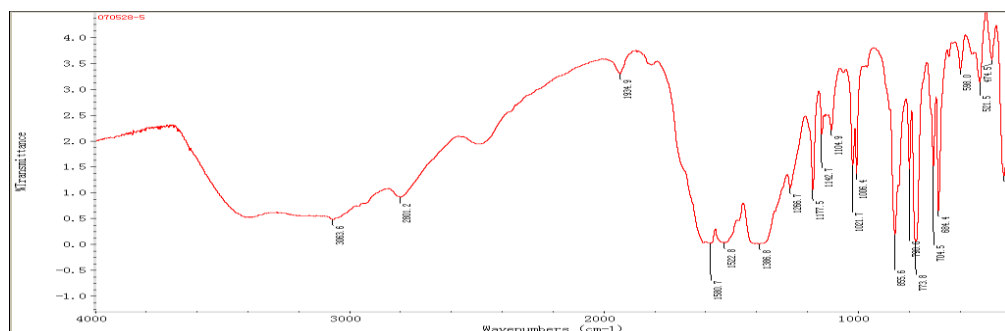

**Fig. S20.** FT-IR spectrum of as-synthesized -5.

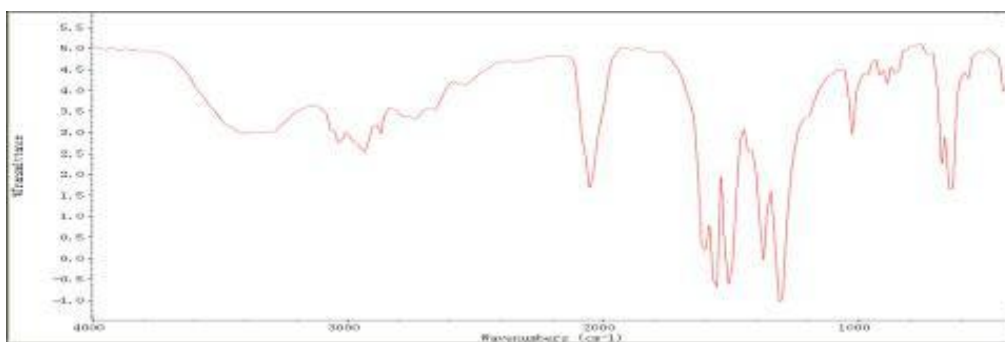

**Fig. S21.** FT-IR spectrum of as-synthesized -6

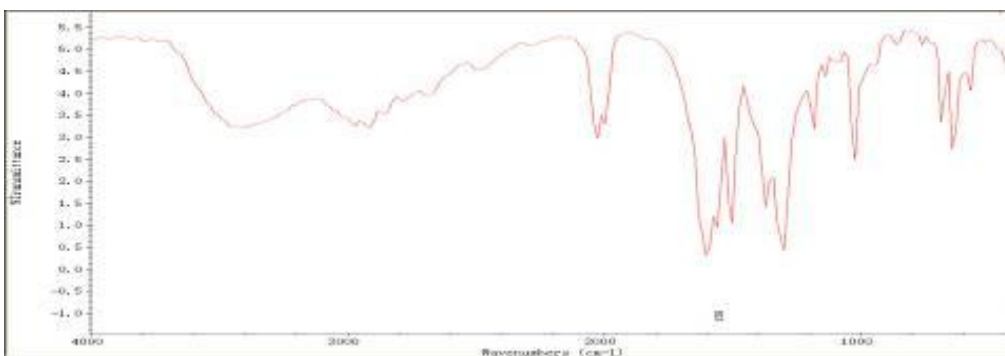

**Fig. S22.** FT-IR spectrum of as-synthesized -7



## TGA analysis:

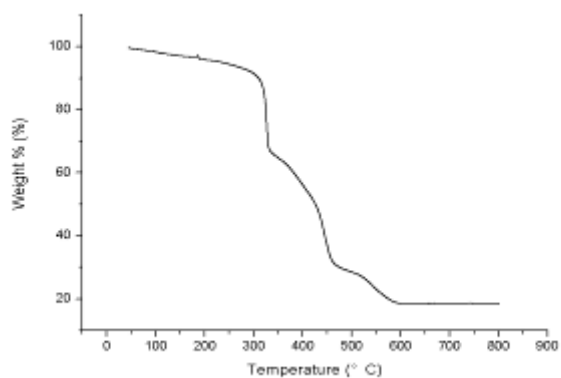

**Fig. S23.** TG curve of 2.

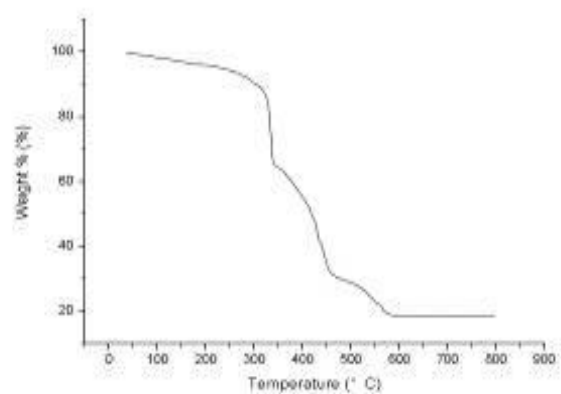

**Fig. S24.** TG curve of 3

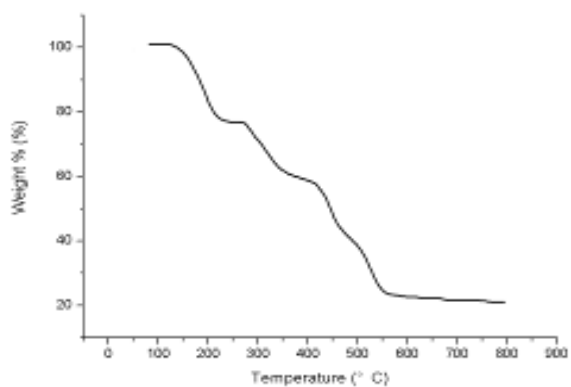

**Fig. S25.** TG curve of 4

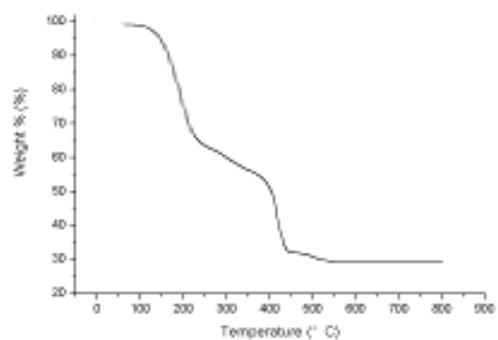

**Fig. S26.** TG curve of **5**

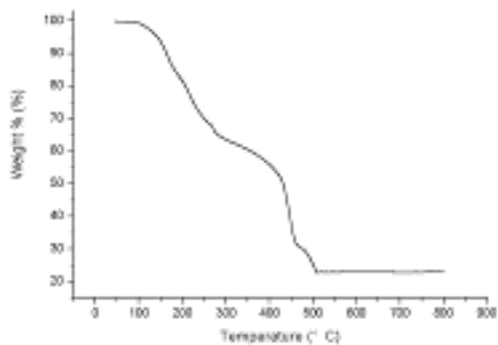

**Fig. S27.** TG curve of **6**

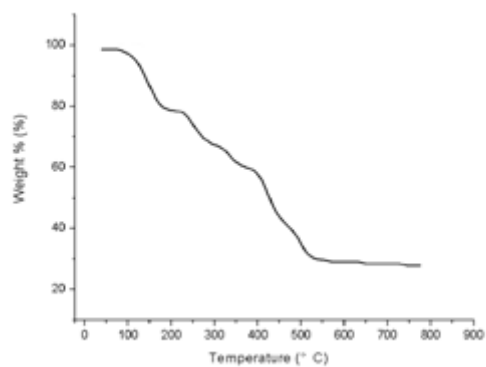

**Fig. S28.** TG curve of **7**

## The coordinates for idealized net computed with Systre (Compounds 5, 6 and 7)

CRYSTAL

NAME "Compound 5 (3,3,4,5)-c trans [45]"

GROUP R-3c:H

CELL 7.91537 7.91537 2.73089 90.0000 90.0000 120.0000

NODE 1 3 0.12080 0.18671 0.07543

NODE 3 5 0.00000 0.16359 0.25000

NODE 2 3 0.28992 0.00000 0.25000

NODE 4 4 0.00000 0.24902 0.75000

EDGE 0.00000 0.16359 0.25000 -0.00000 0.28992 0.25000

EDGE 0.00000 0.24902 0.75000 0.06591 0.18671 0.57543

EDGE 0.28992 0.00000 0.25000 0.41765 0.08432 0.08333

EDGE 0.00000 0.16359 0.25000 0.12080 0.18671 0.07543

EDGE 0.00000 0.16359 0.25000 0.06591 0.18671 0.57543

# EDGE\_CENTER 0.00000 0.22675 0.25000

# EDGE\_CENTER 0.03296 0.21786 0.66271

# EDGE\_CENTER 0.35379 0.04216 0.16667

# EDGE\_CENTER 0.06040 0.17515 0.16271

# EDGE\_CENTER 0.03296 0.17515 0.41271

END

CRYSTAL

NAME "Compound 6 (3,4,6)-c trans [3222]; 6[6<sup>6</sup>]+[6<sup>12</sup>]"

GROUP Im-3

CELL 3.77123 3.77123 3.77123 90.0000 90.0000 90.0000

NODE 2 6 0.25000 0.25000 0.25000

NODE 1 3 0.00000 0.18764 0.31263

NODE 3 4 0.00000 0.00000 0.50000

EDGE 0.00000 0.00000 0.50000 0.00000 0.18764 0.31263

EDGE 0.00000 0.18764 0.31263 0.25000 0.25000 0.25000

# EDGE\_CENTER 0.00000 0.09382 0.40632

# EDGE\_CENTER 0.12500 0.21882 0.28132

END

CRYSTAL

NAME "Compound 7 (3,3,3,5,6)-c trans [59]"

GROUP Pnma

CELL 2.86160 4.87780 2.88729 90.0000 90.0000 90.0000

NODE 5 3 0.29588 0.08602 0.27164

NODE 2 6 0.12278 0.56272 0.43712

NODE 4 3 0.01637 0.25000 0.53407

NODE 1 5 0.35973 0.25000 0.46964

```
NODE 3 3 0.44449 0.62084 0.34412
EDGE 0.29588 0.08602 0.27164 0.37722 0.06272 -0.06288
EDGE 0.01637 0.25000 0.53407 -0.12278 0.06272 0.56288
EDGE 0.01637 0.25000 0.53407 0.35973 0.25000 0.46964
EDGE 0.12278 0.56272 0.43712 0.44449 0.62084 0.34412
EDGE 0.12278 0.56272 0.43712 -0.12278 0.43728 0.56288
EDGE 0.29588 0.08602 0.27164 0.12278 -0.06272 0.43712
EDGE 0.12278 0.56272 0.43712 -0.05551 0.62084 0.15588
EDGE 0.35973 0.25000 0.46964 0.55551 0.12084 0.65588
EDGE 0.29588 0.08602 0.27164 0.35973 0.25000 0.46964
# EDGE_CENTER 0.33655 0.07437 0.10438
# EDGE_CENTER -0.05321 0.15636 0.54848
# EDGE_CENTER 0.18805 0.25000 0.50185
# EDGE_CENTER 0.28363 0.59178 0.39062
# EDGE_CENTER 0.00000 0.50000 0.50000
# EDGE_CENTER 0.20933 0.01165 0.35438
# EDGE_CENTER 0.03363 0.59178 0.29650
# EDGE_CENTER 0.45762 0.18542 0.56276
# EDGE_CENTER 0.32780 0.16801 0.37064
END
```
